# Supplementary material for: Tva svenska oversattningar av Jane Austens Emma - En jamforande studie utifran Vinay och Darbelnets indirekta oversattningstekniker
Source: publisher site journal article supplement (doi:10.1515/cclm-2017-0208), 2013-12-19
Supplement: Supplementary file 1 [file cclm-2017-0208_suppl.docx]

| **Supplementary Table 1 :** Summary of biomarker results**.** | | |
| --- | --- | --- |
| **Biomarker** | **Method** | **Result** |
| *ABL1* | NGS | Mutation Not Detected |
| *AKT1* | NGS | Mutation Not Detected |
| *ALK* | NGS | Mutation Not Detected |
| AR | IHC | Negative |
| *APC* | NGS | Mutation Not Detected |
| *ATM* | NGS | Mutation Not Detected |
| *BRAF* | NGS | Mutation Not Detected |
| *BRCA1* | NGS | V199M |
| *BRCA2* | NGS | Mutation Not Detected |
| *CDH1* | NGS | Mutation Not Detected |
| *c-KIT* | NGS | Mutation Not Detected |
| cMET | IHC | Positive |
| *cMET* | NGS | Mutation Not Detected |
| cMET | CISH | Not Amplified |
| *CSF1R* | NGS | Mutation Not Detected |
| *CTNNB1* | NGS | Mutation Not Detected |
| EGFR | IHC | Positive |
| *EGFR* | NGS | Mutation Not Detected |
| ER | IHC | Positive |
| *ERBB4* | NGS | Mutation Not Detected |
| *FBXW7* | NGS | Mutation Not Detected |
| *FGFR1* | NGS | Mutation Not Detected |
| *FGFR2* | NGS | Mutation Not Detected |
| *FLT3* | NGS | Mutation Not Detected |
| *GNA11* | NGS | Mutation Not Detected |
| *GNAQ* | NGS | Mutation Not Detected |
| *GNAS* | NGS | Mutation Not Detected |
| Her2/Neu | IHC | Negative |
| Her2/Neu | CISH | Not Amplified |
| *Her2/Neu* | NGS | Mutation Not Detected |
| *HNF1A* | NGS | P291fs |
| *HRAS* | NGS | Mutation Not Detected |
| *IDH1* | NGS | Mutation Not Detected |
| *JAK2* | NGS | Mutation Not Detected |
| *JAK3* | NGS | Mutation Not Detected |
| *(VEGFR2)* | NGS | Mutation Not Detected |
| *KRAS* | NGS | Mutation Not Detected |
| MGMT | IHC | Positive |
| *MPL* | NGS | Mutation Not Detected |
| *NOTCH1* | NGS | Mutation Not Detected |
| *NPM1* | NGS | Mutation Not Detected |
| *NRAS* | NGS | Mutation Not Detected |
| PD-1 | IHC | Positive |
| *PDGFRA* | NGS | Mutation Not Detected |
| PD-L1 | IHC | Negative |
| PGP | IHC | Negative |
| *PIK3CA* | NGS | R93W |
| *PIK3CA* | NGS | H1047R |
| PR | IHC | Positive |
| *PTEN* | NGS | R173C |
| PTEN | IHC | Negative |
| *PTEN* | NGS | R233X |
| *PTEN* | NGS | G209R |
| *PTPN11* | NGS | Mutation Not Detected |
| *RB1* | NGS | Mutation Not Detected |
| *RET* | NGS | Mutation Not Detected |
| RRM1 | IHC | Positive |
| *SMAD4* | NGS | Mutation Not Detected |
| *SMARCB1* | NGS | Mutation Not Detected |
| *SMO* | NGS | Mutation Not Detected |
| SPARC | IHC | Positive |
| *STK11* | NGS | P369S |
| TLE3 | IHC | Positive |
| TOP2A | IHC | Positive |
| TOPO1 | IHC | Negative |
| *TP53* | NGS | Mutation Not Detected |
| TS | IHC | Positive |
| TUBB3 | IHC | Negative |
| *VHL* | NGS | Mutation Not Detected |

**Supplementary Table 2:** Copy number variation analysis by Chromogenic In Situ Hybridization.

| **Gene** | **Cells Counted** | **Average Gene copy number** | **Control copy number** | **Ratio** | **Result** |
| --- | --- | --- | --- | --- | --- |
| Her2/Neu | 20 | 2.5 | 1.9 | 1.32 | Not Amplified |
| cMET | 20 | 1.65 | 1.65 | 1 | Not Amplified |
